# Supplementary material for: Effect of the coordination of π-acceptor 4-cyanopyridine ligand on the structural and electronic properties ofmeso-tetra(para-methoxy) andmeso-tetra(para-chlorophenyl) porphyrin cobalt(ii) coordination compounds. Application in the catalytic degradation of methylene blue dye
Source: Royal Society of Chemistry journal article supplement (doi:10.1039/c9ra08504a), 2020-01-01
Supplement: c9ra08504a1.pdf [file c9ra08504a1.pdf]

**Effect of the coordination of the  $\pi$ -acceptor 4-cyanopyridine ligand on the structural and electronic properties of the *meso*-tetra(*para*-methoxy) and the *meso*-tetra(*para*-chlorophenyl) porphyrins cobalt(II) coordination compounds. Application in the catalytic degradation of the methylene blue dye**

**Table of contents**

|                                                                        |                |
|------------------------------------------------------------------------|----------------|
| <b>1. Mass spectrometry .....</b>                                      | <b>page 2</b>  |
| <b>2. <sup>1</sup>H NMR spectra .....</b>                              | <b>page 3</b>  |
| <b>3. Fluorescence spectroscopy .....</b>                              | <b>page 4</b>  |
| <b>4. Crystallographic data .....</b>                                  | <b>page 5</b>  |
| <b>5. The catalytic Adsorption and degradation of the MB dye .....</b> | <b>page 11</b> |

## 1. Mass spectroscopy

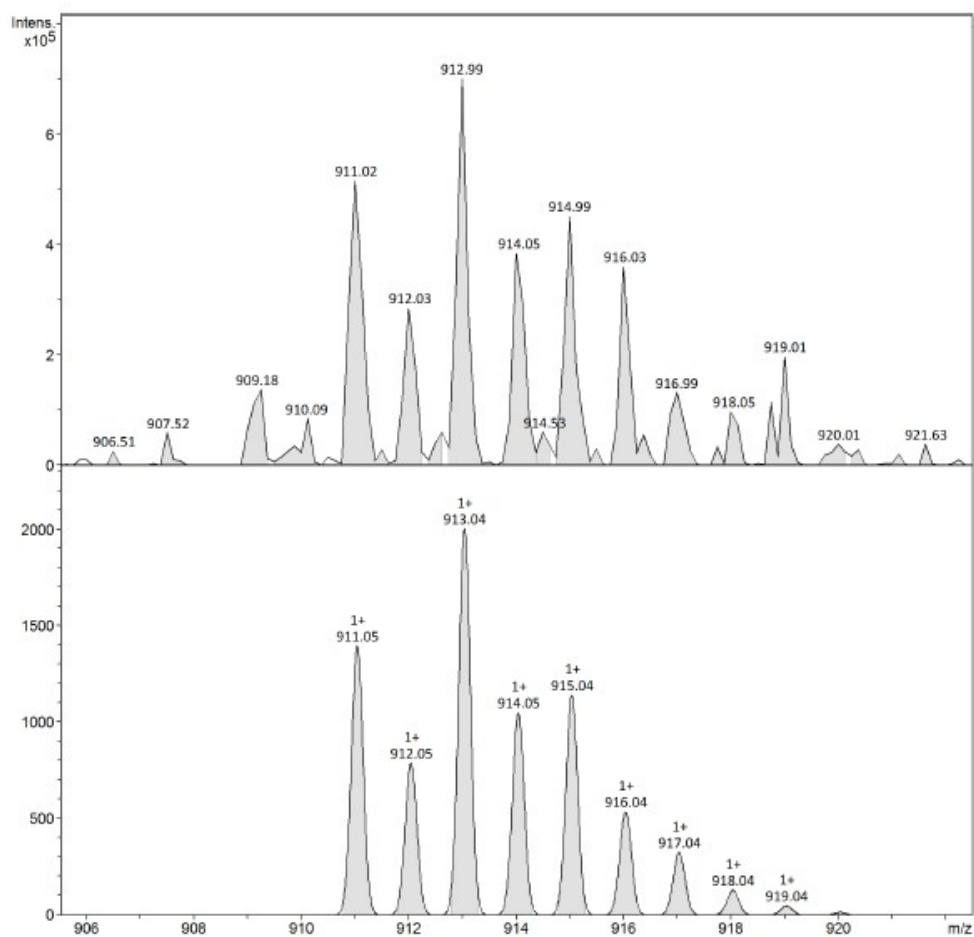

Figure SI-1. ESI- spectrum of complex **2** showing the isotopic ratio in  $m/z = 913$  region ( $[\text{Co}^{\text{II}}(\text{TCIPP})(4\text{-CNpy})]^+$ ). The solvent used is the THF with a concentration of  $5 \cdot 10^{-3} \text{ M}$  and diluted in methanol with a concentration of  $5 \cdot 10^{-5} \text{ M}$ .

## 2. $^1\text{H}$ NMR spectroscopy

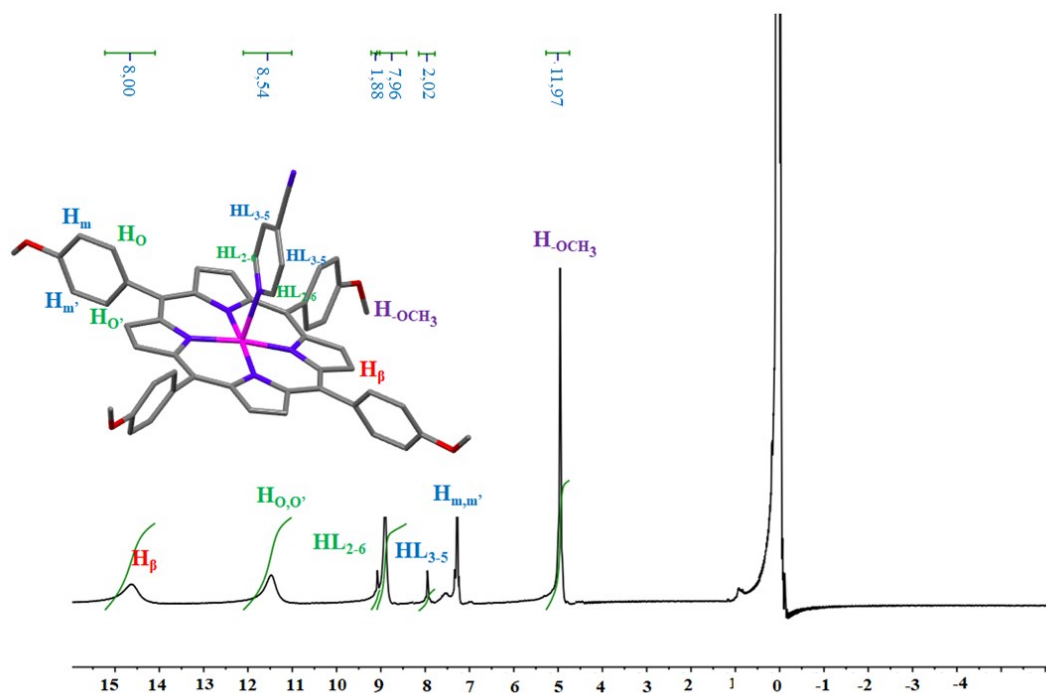

Figure SI-2.  $^1\text{H}$  NMR (400 MHz) spectra in  $\text{CDCl}_3$  of complex  $[\text{Co}^{\text{II}}(\text{TMPP})(4\text{-CNpy})]$  (**1**). The concentration is  $\sim 10^{-3}$  M.

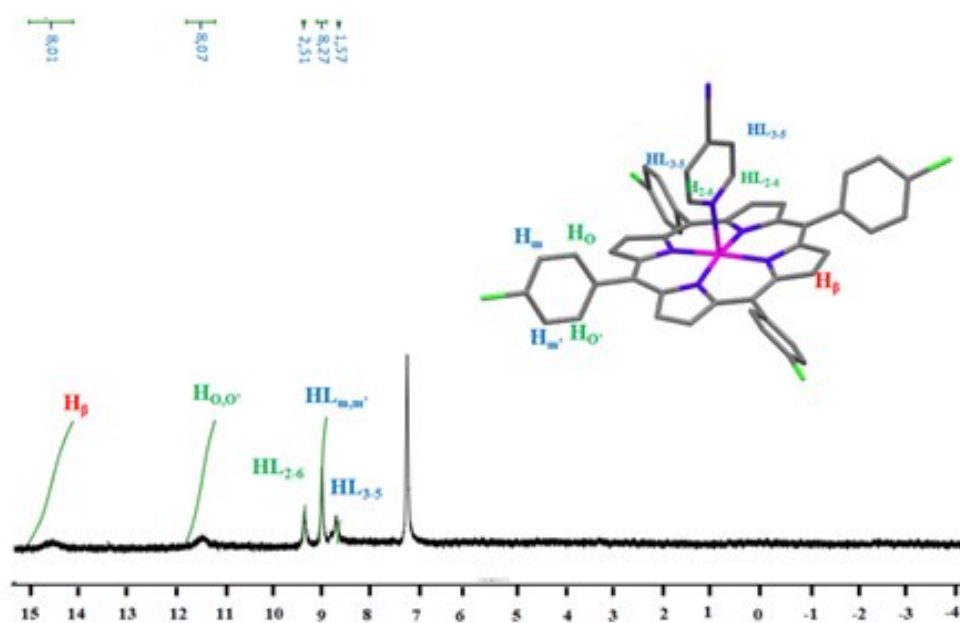

Figure SI-3.  $^1\text{H}$  NMR (400 MHz) spectra in  $\text{CDCl}_3$  of complex  $[\text{Co}^{\text{II}}(\text{TCIPP})(4\text{-CNpy})]$  (**2**). The concentration is  $\sim 10^{-3}$  M.

### 3. Fluorescence spectroscopy

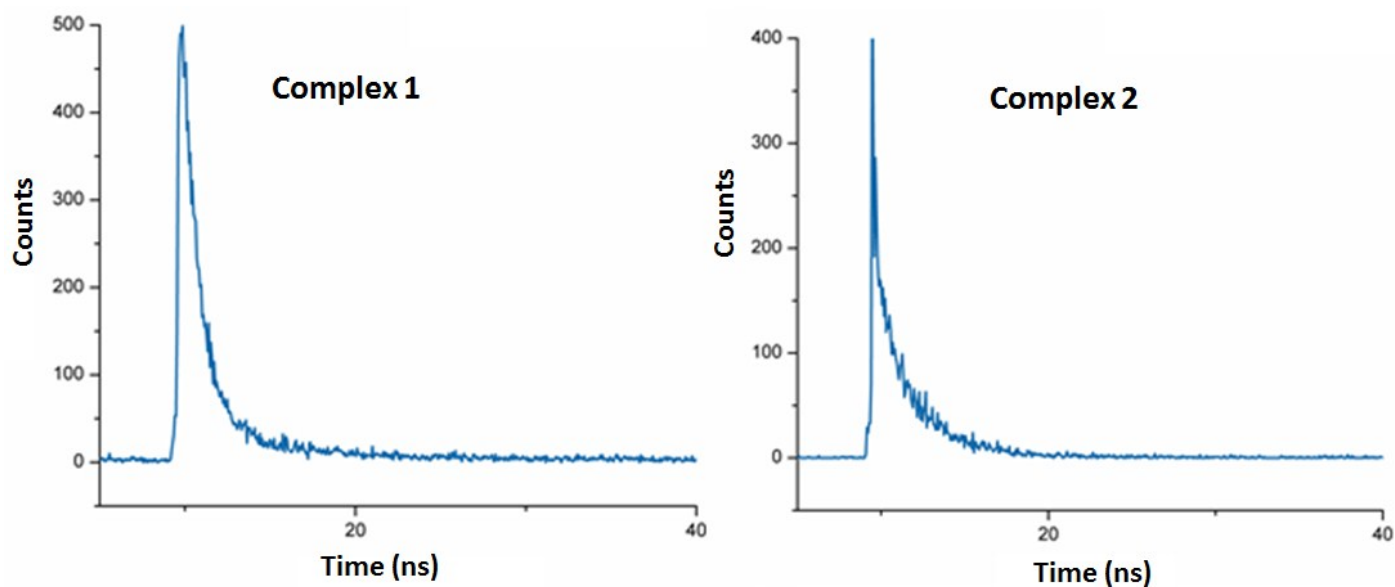

Figure SI-4. Fluorescence decay profiles of [Co<sup>II</sup>(TMPP)(4-CNpy)] (1) (left) and [Co<sup>II</sup>(TCIPP)(4-CNpy)] (2) (right).

### 4. X-ray crystallography

Table SI-1. Selected bond distances (Å) and angles (°) in the molecular structures of complexes 1-2.

| Complex 1                                |            | Complex 2 |            |
|------------------------------------------|------------|-----------|------------|
| <i>Cobaltous coordination polyhedron</i> |            |           |            |
| Co-N1                                    | 1.987(3)   | Co-N1     | 1.968(2)   |
| Co-N2                                    | 1.977(3)   | Co-N2     | 1.976(2)   |
| Co-N3                                    | 1.984(3)   | Co-N3     | 1.983(2)   |
| Co-N4                                    | 1.990(3)   | Co-N4     | 1.980(2)   |
| Co-N5                                    | 2.209(3)   | Co-N5     | 2.196(3)   |
| N1-Co-N2                                 | 90.21(12)  | N1-Co-N2  | 89.57(10)  |
| N1-Co-N3                                 | 171.05(12) | N1-Co-N3  | 175.71(10) |
| N1-Co-N4                                 | 89.51(12)  | N1-Co-N4  | 89.85(10)  |
| N2-Co-N3                                 | 89.21(12)  | N2-Co-N3  | 90.15(10)  |
| N3-Co-N4                                 | 90.28(12)  | N3-Co-N4  | 89.67(11)  |
| N2-Co-N4                                 | 174.92(11) | N2-Co-N4  | 169.84(11) |
| N5-Co-N1                                 | 94.77(11)  | N5-Co-N1  | 94.24(9)   |
| N5-Co-N2                                 | 91.96(11)  | N5-Co-N2  | 94.55(10)  |
| N5-Co-N3                                 | 94.17(11)  | N5-Co-N3  | 90.05(10)  |
| N5-Co-N4                                 | 93.11(11)  | N5-Co-N4  | 95.62(10)  |

4-cyanopyridine axial ligand

|             |          |             |          |
|-------------|----------|-------------|----------|
| N5-C49      | 1.340(5) | N5-C45      | 1.338(4) |
| C49-C50     | 1.370(5) | C45-C46     | 1.384(5) |
| C50-C51     | 1.387(5) | C46-C47     | 1.379(5) |
| C51-C52     | 1.378(5) | C47-C48     | 1.392(5) |
| C52-C53     | 1.390(5) | C48-C49     | 1.382(5) |
| C53-N5      | 1.332(4) | C49-N5      | 1.326(4) |
| C51-C54     | 1.449(5) | C47-C50     | 1.446(5) |
| C54-N6      | 1.139(5) | C50-N6      | 1.146(5) |
| C49-N5-Co   | 120.9(2) | C45-N5-Co   | 121.4(2) |
| C53-N5-Co   | 122.0(2) | C49-N5-Co   | 120.7(2) |
| C49-N5-C53  | 117.0(3) | C45-N5-C49  | 117.7(3) |
| C50-C51-C54 | 119.5(4) | C46-C47-C50 | 121.5(3) |
| C52-C51-C54 | 121.3(3) | C48-C47-C50 | 119.6(3) |
| C51-C54-N6  | 178.7(5) | C47-C50-N6  | 179.1(5) |

Table SI-2. Crystal data and structural refinement for (2), [Co<sup>II</sup>(TMPP)(4,4'-bipy)].CHCl<sub>3</sub> (1) and [Co<sup>II</sup>(TCIPP)(4,4'-bipy)] (2).

|                                                                                                                                 | Complex 1<br>TMPP-4-CNpy                                                         | Complex 2<br>TCIPP-4-CNpy                                         |
|---------------------------------------------------------------------------------------------------------------------------------|----------------------------------------------------------------------------------|-------------------------------------------------------------------|
| Formula                                                                                                                         | C <sub>55</sub> H <sub>41</sub> N <sub>6</sub> O <sub>4</sub> Cl <sub>7</sub> Co | C <sub>50</sub> H <sub>28</sub> N <sub>6</sub> Cl <sub>4</sub> Co |
| Crystal System                                                                                                                  | Monoclinic                                                                       | Triclinic                                                         |
| Crystal                                                                                                                         | <i>C2/c</i>                                                                      | <i>P-1</i>                                                        |
| <i>a</i> (Å)                                                                                                                    | 36.676 (4)                                                                       | 11.081(2)                                                         |
| <i>b</i> (Å)                                                                                                                    | 13.413 (2)                                                                       | 13.386(3)                                                         |
| <i>c</i> (Å)                                                                                                                    | 19.944 (2)                                                                       | 15.426(3)                                                         |
| $\alpha$ (°)                                                                                                                    | 90.00                                                                            | 83.38(3)                                                          |
| $\beta$ (°)                                                                                                                     | 103.378 (4)                                                                      | 83.88(3)                                                          |
| $\gamma$ (°)                                                                                                                    | 90.00                                                                            | 88.67(3)                                                          |
| <i>V</i> (Å <sup>3</sup> )                                                                                                      | 9544.6(18)                                                                       | 2259.8(8)                                                         |
| <i>Z</i>                                                                                                                        | 8                                                                                | 2                                                                 |
| $\rho_{\text{calc.}}$ / g cm <sup>-3</sup>                                                                                      | 1.413                                                                            | 1.343                                                             |
| X-ray radiation                                                                                                                 | Mo K $\alpha$                                                                    | Mo K $\alpha$                                                     |
| $\mu$ / mm <sup>-1</sup>                                                                                                        | 0.583                                                                            | 0.658                                                             |
| <i>F</i> (000)                                                                                                                  | 4184                                                                             | 930                                                               |
| Crystal size (mm <sup>3</sup> )                                                                                                 | 0.56 x 0.31 x 0.07                                                               | 0.40 x 0.30 x 0.29                                                |
| Crystal Color                                                                                                                   | dark                                                                             | black                                                             |
| Crystal Shape                                                                                                                   | prism                                                                            | block                                                             |
| <i>T</i> (K)                                                                                                                    | 150 (2)                                                                          | 200 (2)                                                           |
| $\theta_{\text{min}} - \theta_{\text{max}}$ (°)                                                                                 | 3.038 – 25.998                                                                   | 1.915 – 25.999                                                    |
| Limiting indices                                                                                                                | -40 ≤ <i>h</i> ≤ 40, -16 ≤ <i>k</i> ≤ 15<br>-14 ≤ <i>l</i> ≤ 24                  | -13 ≤ <i>h</i> ≤ 13, -16 ≤ <i>k</i> ≤ 16<br>-18 ≤ <i>l</i> ≤ 19   |
| <i>R</i> ( <i>int</i> )                                                                                                         | 0.0413                                                                           | 0.0527                                                            |
| Reflections collected/unique                                                                                                    | 39202 / 9176                                                                     | 30240 / 8766                                                      |
| Observed data [ <i>I</i> <sub>o</sub> > 2σ( <i>F</i> <sub>o</sub> )]                                                            | 7380                                                                             | 6899                                                              |
| Parameters/Rest                                                                                                                 | 640 / 75                                                                         | 587 / 0                                                           |
| <i>S</i> [all data]                                                                                                             | 1.033                                                                            | 1.131                                                             |
| <i>R</i> <sub>1</sub> <sup>a</sup> , <i>wR</i> <sub>2</sub> <sup>c</sup> [ <i>F</i> <sub>o</sub> > 4σ( <i>F</i> <sub>o</sub> )] | <i>R</i> <sub>1</sub> ≤ 0.0683, <i>wR</i> <sub>2</sub> = 0.1695                  | <i>R</i> <sub>1</sub> = 0.0638, <i>wR</i> <sub>2</sub> = 0.1801   |
| [all data]                                                                                                                      | <i>R</i> <sub>1</sub> = 0.0860, <i>wR</i> <sub>2</sub> = 0.1847                  | <i>R</i> <sub>1</sub> = 0.0821, <i>wR</i> <sub>2</sub> = 0.2025   |

---

<sup>a</sup>:  $R_1 = \frac{\sum||F_o| - |F_c||}{\sum|F_o|}$ , <sup>b</sup>:  $wR_2 = \frac{\{\sum[w(|F_o|^2 - |F_c|^2)^2]\}}{\sum[w(|F_o|^2)^2]}$

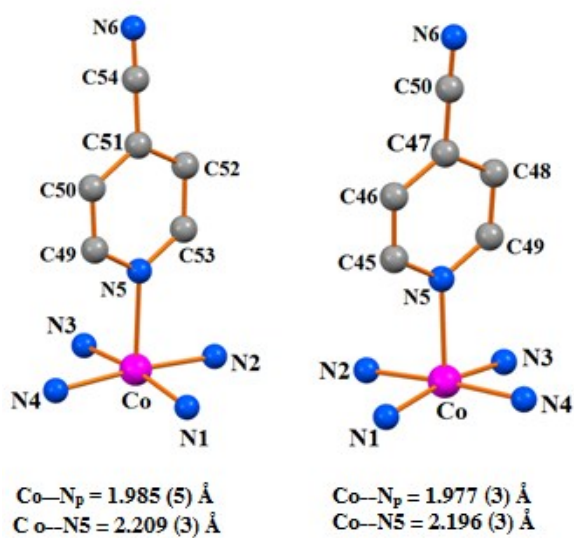

Figure SI-5. Coordination polyhedra of the cobalt center metal in  $[\text{Co}^{\text{II}}(\text{TMPP})(4\text{-CNpy})]$  (1) (left) and  $[\text{Co}^{\text{II}}(\text{TCIPP})(4\text{-CNpy})]$  (2) (right).

Table-SI-3. Selected hydrogen bonds for complexes **1-2**.

| D–H⋯A <sup>a</sup> | Symmetry of A     | D⋯A (Å)   | D–H⋯A (°) |
|--------------------|-------------------|-----------|-----------|
| <b>Complex 1</b>   |                   |           |           |
| C8-H8-O2A          | 1-x,1-y,2-z       | 3.325(4)  | 147       |
| C27A-H27C-Cl3B     | x-1/2,3/2-y,z+1/2 | 3.219(13) | 154       |
| C49-H49-N4         | x,y,z             | 3.121(5)  | 121       |
| C53-H53-N2         | xyz               | 3.103(5)  | 120       |
| C55B-H55-N2        | x,y,-1+z          | 3.199(7)  | 143       |
| C52-H52-N6         | 3/2-x,3/2-y,2-z   | 3.544(9)  | 136       |
| C3-H3-CL3B         | 3/2-x,1/2+y,1/2-z | 3.521(9)  | 124       |
| C8-H8-O2B          | 1-x,1-y,2-z       | 3.5325(5) | 147       |
| C12-H12-O1A        | 1-x,y-1,3/2-z     | 3.769(11) | 141       |
| C13-H13-CL3A       | 3/2-x,1/2-y,1-z   | 3.412(6)  | 134       |
| C48-H48A-O3A       | 3/2-x,1/2-y,1-z   | 3.431(7)  | 142       |
| C48-H48A-O3B       | 3/2-x,1/2-y,1-z   | 3.431(7)  | 142       |
| C17-H17-N6         | 3/2-x,y-1/2,3/2-z | 3.579(6)  | 129       |
| C22-H22-C11A       | 3/2-x,3/2-y,1-z   | 3.806(6)  | 144       |
| C22-H22-C11B       | 3/2-x,3/2-y,1-z   | 3.806(6)  | 144       |
| C26-H26-O2A        | x,1-y,z-1/2       | 3.707(5)  | 165       |
| C26-H26-O28        | x,1-y,z-1/2       | 3.707(5)  | 165       |
| <b>Complex 2</b>   |                   |           |           |
| C48-H48-N6         | 1-x,1-y,2-z       | 3.527(6)  | 156       |

<sup>a</sup>: D = donor atom and A = acceptor atom.

Table-SI-4. Selected intermolecular C–H⋯Cg interactions of complexes **1-2**.

| D–H⋯A <sup>a</sup> | Symmetry of A   | D⋯A (Å)   | D–H⋯A (°) |
|--------------------|-----------------|-----------|-----------|
| <b>Complex 1</b>   |                 |           |           |
| C27A-H27A-Cg12     | 1-x,1+y,3/2-z   | 3.719(9)  | 139       |
| C30A-H30A-Cg1      | x,1-y,1/2+z     | 3.680(11) | 131       |
| C30B-H30B-Cg1      | x,1-y,1/2+z     | 3.619(10) | 125       |
| C34A-H34C-Cg4      | 1-x,y,3/2-z     | 3.463(15) | 115       |
| C46-H46-Cg3        | x,1-y,z-1/2     | 3.647(4)  | 134       |
| C48-H48B-Cg14      | 3/2-x,3/2-y,1-z | 3.664(6)  | 153       |
| C56-H53-Cg11       | 1-x,1+y,3/2-z   | 3.563(4)  | 147       |
| C27B-H27D-Cg11     | 1-x,1+y,3/2-z   | 3.659(12) | 126       |
| C27B-27F-Cg3       | x,1+y,z         | 3.536(14) | 120       |
| C41B-H41D-Cg9      | x,y-1,z         | 3.36(3)   | 113       |
| C41B-H41F-Cg1      | x,y-1,z         | 3.7(3)    | 159       |

## Complex 2

|             |                |           |     |
|-------------|----------------|-----------|-----|
| C48-H48-N6  | -x+1,-y+1,-z+2 | 3.527 (6) | 155 |
| C23-H23-Cg1 | 1-x,1-y,1-z    | 3.613(4)  | 137 |

<sup>a</sup>: D = donor atom and A = acceptor atom.

### Complex 1

- Cg1 is the centroid of the N1/C(1)-C(4) phenyl ring.
- Cg3 is the centroid of the N3/C(11)-C(14) phenyl ring.
- Cg4 is the centroid of the N4/C(16)-C(19) phenyl ring.
- Cg9 is the centroid of the N5/C(49)-C(53) phenyl ring.
- Cg11 is the centroid of the C(28A)-C(33A) phenyl ring.
- Cg12 is the centroid of the C(28B)-C(33B) phenyl ring.
- Cg13 is the centroid of the C(35)-C(40) phenyl ring.
- Cg14 is the centroid of the C(42)-C(47) phenyl ring.

### Complex 2

- Cg1 is the centroid of the N1/C(1)-C(4) phenyl ring.

Table-SI-5. Intermolecular interactions type Cg...Cg<sup>a</sup>, for complex 2.

| Cg(I) <sup>a</sup> | Cg(J) <sup>a</sup> | Cg...Cg <sup>a</sup> | $\alpha^a$ | CgI_Perp <sup>a</sup> | CgJ_perp <sup>a</sup> |
|--------------------|--------------------|----------------------|------------|-----------------------|-----------------------|
| Cg(1) <sup>b</sup> | Cg2 <sup>c</sup>   | 3.785(2)             | 15.1(2)    | 3.397(1)              | 3.614(1)              |

<sup>a</sup>: Cg...Cg = distance between ring centroids,  $\alpha$  = dihedral angle between planes *I* and *J*, CgI\_Perp = perpendicular distance of Cg(*I*) on ring *J*, CgJ\_Perp = perpendicular distance of Cg(*J*) on ring *I*.

<sup>b</sup>: Cg1 = the centroid of the N1/C(1)-C(4) phenyl ring.

<sup>c</sup>: Cg2 = the centroid of the N2/C(6)-C(9) phenyl ring.

Symmetry code: -x,1-y,1-z



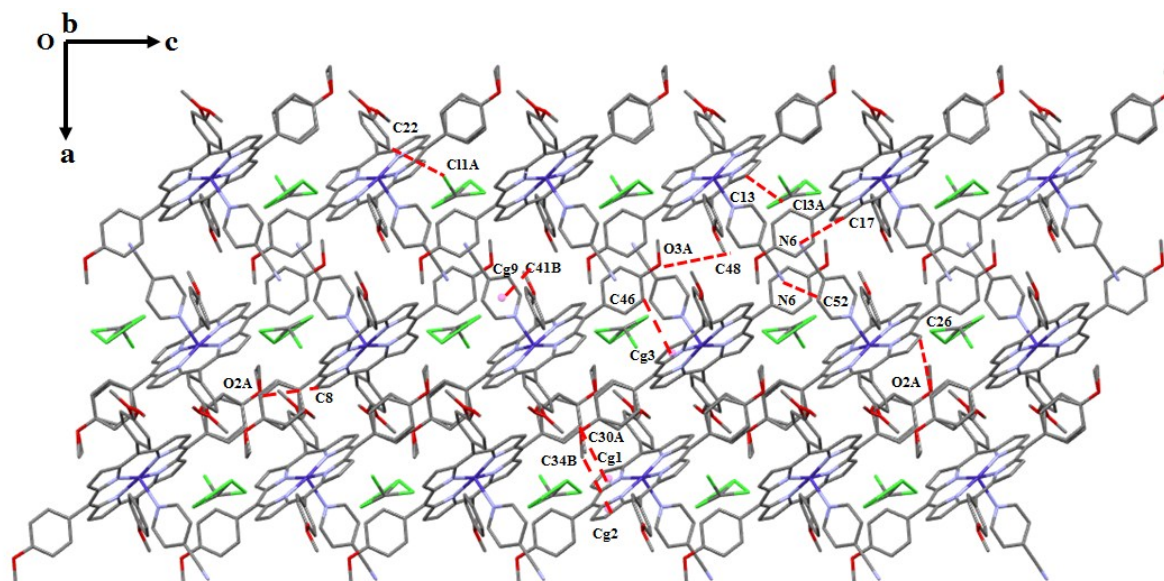

Figure SI-6. The crystal structure of 1 showing the chloroform solvent molecules occupying the voids parallel to the [010] direction.

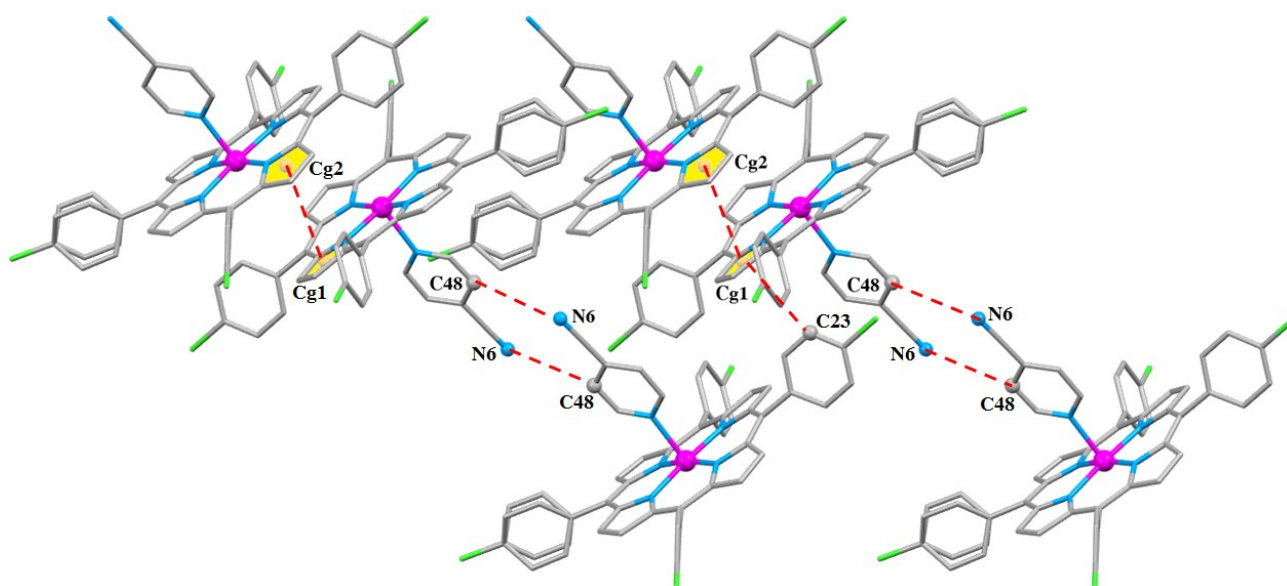

Figure SI-7. Schematic representation showing the weak C–H···N6 intramolecular hydrogen, weak C–H···Cg and Cg···Cg  $\pi$ - $\pi$  intermolecular interactions in complex 2.

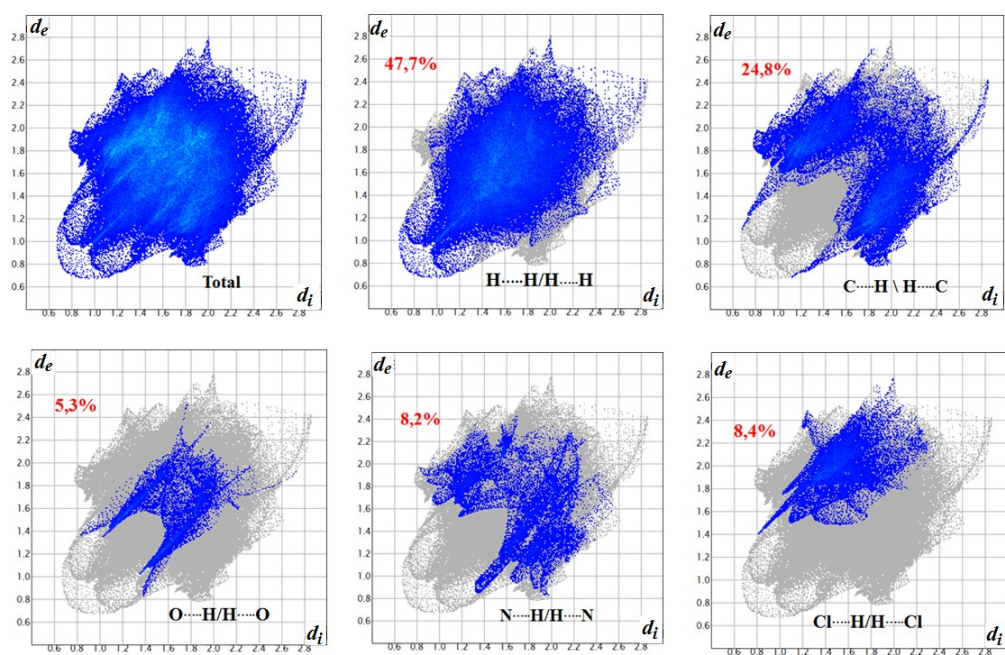

Figure SI-8. 2D fingerprint plots of complex 1 with the major decomposition plots.

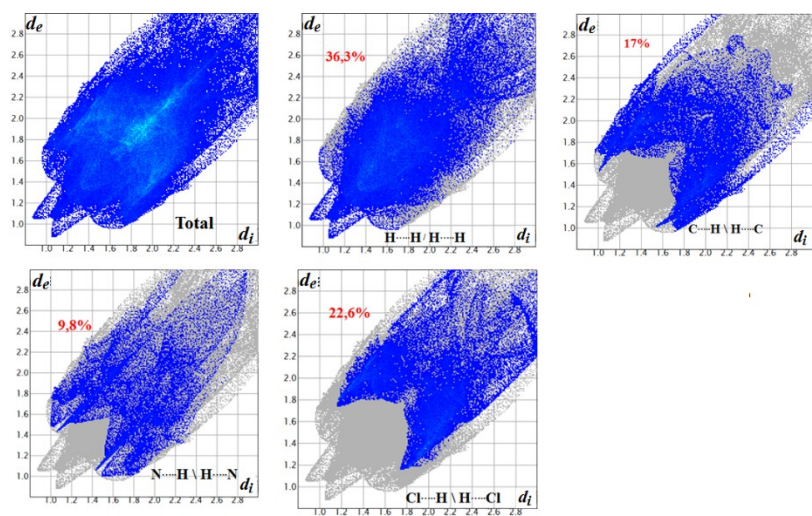

Figure SI-9. 2D fingerprint plots of complex 2 with the major decomposition plots.

## 5. The catalytic Adsorption and degradation of the MB dye

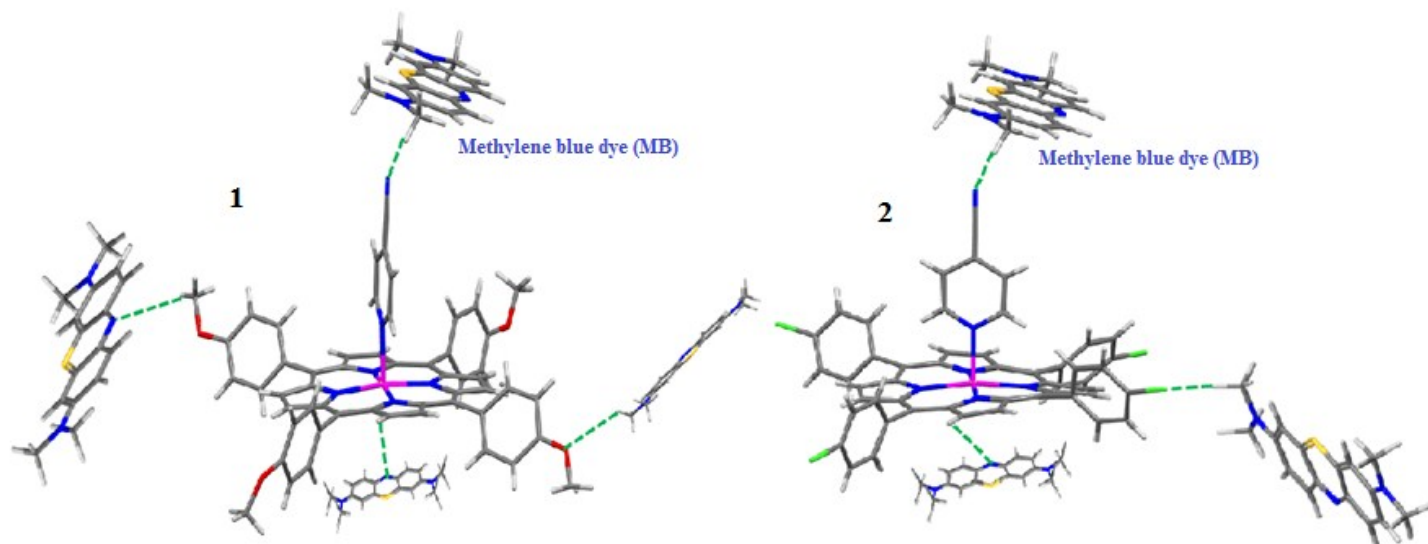

Figure SI-10. Schematic representation showing the adsorption of the methylene blue dye molecules on complexes 1-2.
